# Supplementary material for: The mechanism of the Pd-catalyzed formation of coumarins: a theoretical study
Source: Royal Society of Chemistry journal article supplement (doi:10.1039/c4cp03418j), 2014-11-19
Supplement: c4cp03418j1.pdf [file c4cp03418j1.pdf]

## Mechanism of Pd-catalyzed Formation of Coumarin. A Theoretical Study.

Sean Nedd,<sup>[a]</sup> and Anastassia N. Alexandrova\*<sup>[a,b]</sup>

<sup>[a]</sup> Department of Chemistry and Biochemistry, University of California, Los Angeles

<sup>[b]</sup> California NanoSystems Institute, Los Angeles, CA 90095-1569, USA.

### Supporting Information

#### **XYZ coordinates for all stationary points in the Concerted Metalation-Deprotonation mechanism.**

Structures were obtained from the RI-TPSS/def2-SVP (def2-TZVPP for Pd) level of theory. These structures include:

**cNC** - minima of bound Pd(OAc)<sub>2</sub> and phenylpropiolate with non-cleaved aryl C-H

**c1TS** - 1st transition state from the cleaving of the aryl C-H

**cC** - minima from cleaved aryl C-H

**c2TS** - 2nd transition state from concerted trans-protonation to ethynyl group and coumarin ring closure

**cP** - minima of coumarin product with still bound Pd(OAc)<sub>2</sub> catalyst

**c3TS** - 3rd transition state for removal of Pd(OAc)<sub>2</sub> catalyst from coumarin product

All structures that have trifluoroacetate will start with **f**.

After each label in bold, the absolute total energy (OK) is given (in hartrees), followed by the entropic contribution (in kJ/mol), followed by the imaginary frequency (a negative number) for only the transition state (in cm<sup>-1</sup>).

XYZ coordinates follow on the next set of lines for each label.

#### **cNC**

-1081.30824970455 au, 483.55 kJ/mol

C 1.6731 -0.4620 -2.6606

C 1.4689 0.8969 -2.4600

C 0.2113 1.3440 -1.9790

C 0.6348 -1.3957 -2.4116

C -0.6078 -0.9690 -1.9586

C -0.8485 0.4095 -1.7141

O -0.0584 2.7082 -2.1507

C -0.6928 3.4100 -1.1580

O -1.0759 4.5412 -1.3214

C -0.8477 2.6606 0.0883

C -1.3004 2.2507 1.1864

H 2.6437 -0.8134 -3.0245

H 2.2359 1.6427 -2.6840

H 0.8154 -2.4611 -2.5836

H -1.4162 -1.6792 -1.7653  
H -1.8701 0.7586 -1.5366  
H -1.8018 2.1855 2.1419  
Pd -0.0221 0.7453 0.4072  
O 2.1031 0.6807 1.7712  
O 1.2616 -0.7819 0.3262  
C 2.1503 -0.4422 1.2413  
C 3.1537 -1.5070 1.6069  
H 4.0021 -1.0564 2.1428  
H 3.4989 -2.0407 0.7065  
H 2.6558 -2.2414 2.2647  
O -0.9331 -0.4303 1.9536  
O -2.8534 -0.0089 0.8267  
C -2.1988 -0.6159 1.6881  
C -2.8656 -1.6550 2.5921  
H -2.1533 -2.4339 2.9033  
H -3.2383 -1.1439 3.4976  
H -3.7243 -2.0955 2.0631

#### **fcNC**

-1676.33833351352 au, 354.28 kJ/mol

C 1.8465 -0.1727 -2.4182  
C 1.5655 1.1299 -2.0240  
C 0.2137 1.5230 -1.8691  
C 0.8094 -1.1071 -2.6664  
C -0.5182 -0.7318 -2.5274  
C -0.8492 0.5913 -2.1110  
O -0.0156 2.8983 -1.7888  
C -0.9876 3.4223 -0.9704  
O -1.2934 4.5840 -1.0166  
C -1.6089 2.4360 -0.0790  
C -2.4486 1.7529 0.5504  
H 2.8887 -0.4872 -2.5222  
H 2.3505 1.8651 -1.8356  
H 1.0639 -2.1285 -2.9621  
H -1.3292 -1.4383 -2.7245  
H -1.8748 0.9531 -2.2330  
H -3.2880 1.3756 1.1203  
Pd -0.6902 0.5549 0.1679  
O 2.1127 0.5916 1.0694  
O 0.6485 -0.9251 0.2149  
C 1.7743 -0.5397 0.7628  
C 2.7367 -1.7502 0.9195  
F 3.8266 -1.4161 1.6197  
F 3.1424 -2.1676 -0.3125  
F 2.1357 -2.7884 1.5281

O -2.5212 -1.2228 1.4298  
O -0.8769 0.1526 2.1720  
C -1.7539 -0.8032 2.2896  
C -1.7609 -1.4045 3.7252  
F -2.5466 -2.4888 3.7768  
F -0.5190 -1.7609 4.1043  
F -2.2328 -0.4977 4.6103

### **c1TS**

-1081.28408092116 au, 418.47 kJ/mol, -1432.14 cm<sup>-1</sup>

C 0.7698 0.2153 -4.3213  
C 0.7391 1.5476 -3.8956  
C 0.5855 1.8436 -2.5319  
C 0.6422 -0.8197 -3.3845  
C 0.5042 -0.5174 -2.0206  
C 0.4900 0.8177 -1.5752  
O 0.5875 3.2133 -2.2423  
C -0.0085 3.7436 -1.1433  
O -0.0928 4.9417 -0.9949  
C -0.5077 2.7842 -0.1577  
C -1.2236 2.2294 0.7159  
H 0.8903 -0.0105 -5.3857  
H 0.8292 2.3808 -4.5989  
H 0.6611 -1.8664 -3.7052  
H 0.4377 -1.3303 -1.2900  
H -1.3707 -0.7689 0.4201  
H -2.0147 1.9951 1.4183  
Pd 0.4300 0.9917 0.4144  
O 0.6749 0.3124 2.4917  
O 1.8229 -0.5096 0.7992  
C 1.5336 -0.5260 2.0529  
C 2.1845 -1.5294 2.9641  
H 2.7345 -1.0046 3.7633  
H 2.8666 -2.1788 2.3971  
H 1.3981 -2.1388 3.4405  
O -2.4250 -0.4898 1.1959  
O -0.8744 -1.9031 0.9374  
C -1.8727 -1.5503 1.6590  
C -2.2936 -2.2518 2.9092  
H -3.3701 -2.1153 3.0860  
H -2.0334 -3.3187 2.8538  
H -1.7383 -1.7952 3.7482

### **fc1TS**

-1676.28981899956 au, 280.91 kJ/mol, -1259.84 cm<sup>-1</sup>

C -0.3655 0.4705 -4.2440

C 0.4917 1.4833 -3.7921  
C 0.8370 1.5856 -2.4314  
C -0.8708 -0.4634 -3.3373  
C -0.5596 -0.3445 -1.9526  
C 0.3452 0.6623 -1.4937  
O 1.7417 2.6052 -2.1448  
C 1.7843 3.2572 -0.9368  
O 2.5504 4.1693 -0.7568  
C 0.8419 2.7448 0.0563  
C -0.1463 2.5945 0.8163  
H -0.6214 0.4106 -5.3059  
H 0.9089 2.2232 -4.4822  
H -1.5286 -1.2739 -3.6664  
H -0.7388 -1.2051 -1.2941  
H -2.0128 0.0338 -1.5542  
H -1.0136 2.7151 1.4551  
Pd 0.6473 0.6854 0.4515  
O 0.9015 0.0139 2.5354  
O 0.9148 -1.3613 0.7941  
C 0.9824 -1.1495 2.0569  
C 1.1131 -2.3632 2.9989  
F 1.8168 -2.0379 4.0939  
F 1.7217 -3.3881 2.3814  
F -0.1175 -2.7629 3.3812  
O -3.2170 -0.5226 -1.0200  
O -2.3499 0.6156 0.7483  
C -3.1567 -0.1492 0.2232  
C -4.2248 -0.8546 1.1053  
F -5.3417 -1.1589 0.4190  
F -3.7022 -2.0065 1.5883  
F -4.5673 -0.0818 2.1495

### **cC**

-1081.33361204992 au, 484.86 kJ/mol

C 0.7091 0.1934 -4.2584  
C 0.6910 1.5271 -3.8355  
C 0.5437 1.8259 -2.4718  
C 0.5722 -0.8396 -3.3206  
C 0.4367 -0.5363 -1.9560  
C 0.4389 0.8009 -1.5151  
O 0.5572 3.1954 -2.1809  
C -0.0279 3.7253 -1.0760  
O -0.1024 4.9230 -0.9201  
C -0.5318 2.7644 -0.0931  
C -1.2643 2.2086 0.7696  
H 0.8272 -0.0347 -5.3227

H 0.7869 2.3580 -4.5409  
H 0.5830 -1.8866 -3.6407  
H 0.3522 -1.3455 -1.2211  
H -1.9927 -0.5831 -0.0240  
H -2.0701 2.0293 1.4716  
Pd 0.3729 0.9612 0.4760  
O 0.5839 0.2353 2.5332  
O 1.7625 -0.5483 0.8456  
C 1.4585 -0.5898 2.0940  
C 2.1030 -1.5994 3.0004  
H 2.6079 -1.0815 3.8330  
H 2.8210 -2.2153 2.4407  
H 1.3163 -2.2434 3.4282  
O -2.4031 -0.7656 0.8514  
O -0.7493 -2.3092 0.8401  
C -1.6732 -1.7667 1.4173  
C -2.1131 -2.0583 2.8301  
H -3.1890 -1.8709 2.9674  
H -1.8571 -3.0966 3.0852  
H -1.5502 -1.3767 3.4932

### fcC

-1676.32791562323 au, 321.76 kJ/mol

C 1.0280 -0.2766 -4.3706  
C 0.9573 1.0618 -3.9679  
C 0.4252 1.3833 -2.7097  
C 0.5226 -1.2870 -3.5404  
C 0.0337 -0.9658 -2.2640  
C 0.0443 0.3660 -1.8171  
O 0.3240 2.7525 -2.4556  
C -0.4266 3.2605 -1.4431  
O -0.7730 4.4199 -1.4423  
C -0.7410 2.3480 -0.3402  
C -1.2432 1.9660 0.7549  
H 1.4615 -0.5258 -5.3443  
H 1.2986 1.8783 -4.6109  
H 0.5369 -2.3332 -3.8623  
H -0.2976 -1.7589 -1.5874  
H -3.4639 -1.0214 -0.0282  
H -1.8006 1.9897 1.6859  
Pd 0.0908 0.5011 0.1784  
O 0.7170 -0.0859 2.2098  
O 1.3826 -1.1775 0.4018  
C 1.4080 -0.9953 1.6583  
C 2.3134 -1.8940 2.5268  
F 3.1100 -1.1326 3.3020

F 3.0854 -2.6798 1.7623  
F 1.5682 -2.6782 3.3297  
O -3.5094 -1.2532 0.9249  
O -1.4383 -2.0873 0.4905  
C -2.3580 -1.8633 1.2422  
C -2.3281 -2.2128 2.7499  
F -3.4066 -2.9441 3.0908  
F -1.2256 -2.9076 3.0365  
F -2.3337 -1.0791 3.4816

### **c2TS**

-1081.31794131192 au, 436.29 kJ/mol, -366.04 cm<sup>-1</sup>

C 2.6782 2.2256 -2.6964  
C 1.6267 2.8792 -2.0500  
C 0.6973 2.1344 -1.3014  
C 2.8018 0.8211 -2.6382  
C 1.8684 0.0701 -1.9270  
C 0.7923 0.7075 -1.2520  
O -0.2750 2.8309 -0.6580  
C -1.5544 2.2778 -0.3372  
O -2.2915 2.9451 0.3389  
C -1.7469 0.9290 -0.8733  
C -1.0047 0.2084 -1.7319  
H 3.4126 2.8148 -3.2557  
H 1.5135 3.9664 -2.0848  
H 3.6339 0.3215 -3.1444  
H 1.9624 -1.0173 -1.8497  
H -1.0666 -0.2512 -2.7214  
Pd -0.3139 -0.3352 0.0492  
H -3.0381 0.0406 -0.0134  
O 0.7708 -0.2088 2.0220  
O 1.2474 -1.7798 0.5439  
C 1.4467 -1.2288 1.6872  
C 2.5124 -1.7876 2.6034  
H 3.4806 -1.3245 2.3410  
H 2.6053 -2.8763 2.4687  
H 2.2813 -1.5412 3.6506  
O -3.6551 -0.5209 0.5844  
O -1.7189 -1.5108 1.2315  
C -2.9543 -1.3807 1.2959  
C -3.7755 -2.2127 2.2460  
H -3.9973 -1.6022 3.1396  
H -4.7338 -2.4930 1.7815  
H -3.2059 -3.1014 2.5513

### **fc2TS**

-1676.31454606003 au, 301.27 kJ/mol, -317.01 cm<sup>-1</sup>

C -2.4368 -0.0783 -4.1163

C -2.1275 1.1655 -3.5566

C -1.4090 1.2217 -2.3515

C -2.0633 -1.2749 -3.4738

C -1.3675 -1.2278 -2.2636

C -1.0232 0.0188 -1.6924

O -1.1001 2.4677 -1.8708

C -0.9121 2.7779 -0.5039

O -0.5856 3.8934 -0.2083

C -1.1544 1.6213 0.3792

C -1.6816 0.4383 0.1666

H -2.9815 -0.1175 -5.0650

H -2.4131 2.1039 -4.0400

H -2.3126 -2.2419 -3.9213

H -1.0668 -2.1513 -1.7576

H -0.6355 1.4285 2.3690

H -2.3915 -0.3102 0.5154

Pd 0.2933 0.1537 -0.2002

O 2.0414 0.2588 1.1589

O 2.0204 -1.0074 -0.6600

C 2.5906 -0.5912 0.4021

C 3.9634 -1.1799 0.7925

F 4.7479 -0.2340 1.3350

F 4.5893 -1.6987 -0.2761

F 3.7859 -2.1609 1.7010

O -0.1160 1.1527 3.1768

O -0.6161 -0.9533 2.4652

C -0.0397 -0.1715 3.2003

C 0.8954 -0.6896 4.3208

F 1.7813 -1.5543 3.7939

F 1.5662 0.2906 4.9403

F 0.1588 -1.3502 5.2407

### **cP**

-1081.42457999764 au, 447.76 kJ/mol

C 1.5942 -0.0432 -4.1250

C 1.7837 0.9949 -3.2078

C 0.8631 1.1614 -2.1634

C 0.4931 -0.9167 -4.0116

C -0.4206 -0.7466 -2.9720

C -0.2513 0.2947 -2.0307

O 1.0838 2.1991 -1.2971

C 0.2285 2.5185 -0.2361

O 0.4757 3.4974 0.4230

C -0.9225 1.6029 -0.0307

C -1.1585 0.5231 -0.9215  
H 2.3121 -0.1752 -4.9413  
H 2.6296 1.6836 -3.2785  
H 0.3563 -1.7242 -4.7373  
H -1.2795 -1.4174 -2.8647  
H -1.7071 1.9941 0.6228  
H -2.1278 0.0127 -0.9044  
Pd -0.2308 -0.1560 0.9180  
O 1.7619 -0.2309 0.4010  
O 0.9641 -1.5952 1.9199  
C 1.9740 -1.1720 1.2574  
C 3.3473 -1.7345 1.4652  
H 4.0710 -1.2325 0.8070  
H 3.3327 -2.8183 1.2603  
H 3.6354 -1.5980 2.5212  
O -1.3110 0.8268 3.3004  
O -2.0821 -0.4276 1.6004  
C -2.1987 0.1411 2.7949  
C -3.5326 -0.1524 3.4612  
H -3.6126 -1.2347 3.6612  
H -3.6035 0.4087 4.4039  
H -4.3626 0.1217 2.7885

**fcP**

-1676.40854981989 au, 317.21 kJ/mol

C 0.6942 -1.5708 -2.8390  
C 1.3421 -0.4712 -2.2964  
C 0.5735 0.6240 -1.8334  
C -0.7209 -1.6037 -2.9889  
C -1.4957 -0.5494 -2.5474  
C -0.8733 0.5815 -1.9193  
O 1.2509 1.7605 -1.4942  
C 0.6048 2.7661 -0.7406  
O 1.1878 3.7867 -0.5151  
C -0.7918 2.4354 -0.3442  
C -1.5864 1.5916 -1.1560  
H 1.2857 -2.4333 -3.1594  
H 2.4271 -0.4223 -2.1878  
H -1.1954 -2.4831 -3.4333  
H -2.5873 -0.5743 -2.6178  
H -1.2479 3.1519 0.3425  
H -2.6812 1.6272 -1.1477  
Pd -0.6317 0.3273 0.2455  
O 1.9243 -0.8718 0.6770  
O -0.2052 -1.6347 0.5516  
C 1.0826 -1.7645 0.6695



C 1.5152 -3.2563 0.6997  
F 0.7051 -4.0156 1.4552  
F 2.7690 -3.3897 1.1509  
F 1.4761 -3.7442 -0.5736  
O 0.2775 2.3377 2.3336  
O -1.0321 0.4764 2.2021  
C -0.4455 1.4741 2.8059  
C -0.8137 1.4635 4.3210  
F -0.1688 2.4372 4.9758  
F -2.1438 1.6602 4.4751  
F -0.4952 0.2835 4.8888

### **c3TS**

-1081.40409117479 au, 459.10 kJ/mol, -235.04 cm<sup>-1</sup>

C 1.6382 -0.0016 -3.8567  
C 1.7264 1.1031 -3.0045  
C 0.7777 1.2565 -1.9842  
C 0.6101 -0.9544 -3.7029  
C -0.3343 -0.7949 -2.6897  
C -0.2692 0.3145 -1.8153  
O 0.9108 2.3495 -1.1692  
C 0.0049 2.6626 -0.1454  
O 0.1490 3.7067 0.4416  
C -1.0570 1.6618 0.1114  
C -1.2024 0.5231 -0.7261  
H 2.3811 -0.1257 -4.6517  
H 2.5177 1.8507 -3.1043  
H 0.5554 -1.8155 -4.3759  
H -1.1362 -1.5271 -2.5489  
H -1.8722 2.0157 0.7481  
H -2.1228 -0.0674 -0.6786  
Pd -0.2216 0.0108 1.1323  
O 1.6856 -0.3730 0.3375  
O 0.9405 -1.4066 2.1127  
C 1.8906 -1.2372 1.2648  
C 3.1766 -1.9993 1.3617  
H 3.7667 -1.8666 0.4432  
H 2.9618 -3.0665 1.5349  
H 3.7522 -1.6263 2.2269  
O -1.4056 0.7392 2.9555  
O -2.4268 -0.7213 1.6355  
C -2.3873 -0.0246 2.6970  
C -3.5379 -0.1162 3.6878  
H -3.5781 -1.1434 4.0881  
H -3.4050 0.5998 4.5110  
H -4.4888 0.0739 3.1635

**fc3TS**

-1676.40123597909 au, 343.80 kJ/mol, -18.08 cm<sup>-1</sup>

C 0.9512 -1.1345 -2.6231

C 1.1301 0.1744 -2.2016

C 0.0745 0.8276 -1.5142

C -0.2616 -1.8354 -2.3767

C -1.3038 -1.2145 -1.7170

C -1.1715 0.1448 -1.2581

O 0.2016 2.1645 -1.3071

C -0.8939 2.9972 -0.9434

O -0.6695 4.1709 -0.7962

C -2.1882 2.3228 -0.8012

C -2.3241 0.9788 -0.9277

H 1.7657 -1.6446 -3.1446

H 2.0515 0.7306 -2.3855

H -0.3608 -2.8739 -2.7040

H -2.2527 -1.7304 -1.5395

H -3.0273 2.9766 -0.5534

H -3.2952 0.4939 -0.7840

Pd -0.1752 -0.1635 0.7380

O 2.7498 -0.1760 0.5042

O 1.0373 -1.6444 0.2341

C 2.2959 -1.2908 0.2998

C 3.2207 -2.5137 0.0391

F 4.5105 -2.1624 0.1085

F 2.9944 -3.0238 -1.2013

F 2.9946 -3.4952 0.9338

O -1.3438 1.1813 1.8357

O -0.0295 -0.2667 2.8455

C -0.8807 0.6710 2.9099

C -1.3458 1.2078 4.2761

F -0.6386 2.3072 4.5980

F -2.6487 1.5359 4.2258

F -1.1671 0.2846 5.2300
